# Supplementary material for: LFA-1 nanoclusters integrate TCR stimulation strength to tune T-cell cytotoxic activity
Source: PubMed Central journal article supplement (PMC10776856; doi:10.1038/s41467-024-44688-3), 2024-01-09
Supplement: 41467_2024_44688_MOESM3_ESM.pdf [file 41467_2024_44688_MOESM3_ESM.pdf]

## Description of Additional Supplementary Files

### **Supplementary Movie 1: Dynamics of interactions and cytotoxic activity.**

Representative movie displaying the time-lapse recording of CD8<sup>+</sup> T cells (green) interacting with P815 target cells (unstained) precoated with 1 µg/mL anti-CD3 Ab. Target cell death is monitored through the influx of propidium iodide (red). Time resolution is 1 image per min. Time stamp is hr:min. Scale bar is 10 µm.
