# Supplementary material for: LFA-1 nanoclusters integrate TCR stimulation strength to tune T-cell cytotoxic activity
Source: PubMed Central journal article supplement (PMC10776856; doi:10.1038/s41467-024-44688-3), 2024-01-09
Supplement: 41467_2024_44688_MOESM5_ESM.pdf [file 41467_2024_44688_MOESM5_ESM.pdf]

## Reporting Summary

Nature Portfolio wishes to improve the reproducibility of the work that we publish. This form provides structure for consistency and transparency in reporting. For further information on Nature Portfolio policies, see our [Editorial Policies](#) and the [Editorial Policy Checklist](#).

### Statistics

For all statistical analyses, confirm that the following items are present in the figure legend, table legend, main text, or Methods section.

n/a Confirmed

- The exact sample size ( $n$ ) for each experimental group/condition, given as a discrete number and unit of measurement
- A statement on whether measurements were taken from distinct samples or whether the same sample was measured repeatedly
- The statistical test(s) used AND whether they are one- or two-sided  
*Only common tests should be described solely by name; describe more complex techniques in the Methods section.*
- A description of all covariates tested
- A description of any assumptions or corrections, such as tests of normality and adjustment for multiple comparisons
- A full description of the statistical parameters including central tendency (e.g. means) or other basic estimates (e.g. regression coefficient) AND variation (e.g. standard deviation) or associated estimates of uncertainty (e.g. confidence intervals)
- For null hypothesis testing, the test statistic (e.g.  $F$ ,  $t$ ,  $r$ ) with confidence intervals, effect sizes, degrees of freedom and  $P$  value noted  
*Give  $P$  values as exact values whenever suitable.*
- For Bayesian analysis, information on the choice of priors and Markov chain Monte Carlo settings
- For hierarchical and complex designs, identification of the appropriate level for tests and full reporting of outcomes
- Estimates of effect sizes (e.g. Cohen's  $d$ , Pearson's  $r$ ), indicating how they were calculated

*Our web collection on [statistics for biologists](#) contains articles on many of the points above.*

### Software and code

Policy information about [availability of computer code](#)

Data collection

Commercial software used to collect data: BD FACSDiva v9.0, Harmony high-content analysis software 5.0

Data analysis

Commercial software used to analyze data: Prism 9.4.0, FlowJo 10.9, Fiji, Harmony high-content analysis software 5.0  
A custom code was used to generate artificial STED images. It can be accessed with the following link: <https://doi.org/10.5281/zenodo.10084714>

For manuscripts utilizing custom algorithms or software that are central to the research but not yet described in published literature, software must be made available to editors and reviewers. We strongly encourage code deposition in a community repository (e.g. GitHub). See the Nature Portfolio [guidelines for submitting code & software](#) for further information.

### Data

Policy information about [availability of data](#)

All manuscripts must include a [data availability statement](#). This statement should provide the following information, where applicable:

- Accession codes, unique identifiers, or web links for publicly available datasets
- A description of any restrictions on data availability
- For clinical datasets or third party data, please ensure that the statement adheres to our [policy](#)

The raw data collected to elaborate the figures of the paper are shared via FigShare. All other source data (.tiff images and .fcs flow cytometry files) are available from the corresponding authors upon request. Data are located in controlled access data storage at the INSERM Infinity Institute and the Theoretical Physics

## Research involving human participants, their data, or biological material

Policy information about studies with [human participants or human data](#). See also policy information about [sex, gender \(identity/presentation\), and sexual orientation](#) and [race, ethnicity and racism](#).

|                                                                    |                                                                                                                                             |
|--------------------------------------------------------------------|---------------------------------------------------------------------------------------------------------------------------------------------|
| Reporting on sex and gender                                        | Due to the limited sample size (3 donors), no sex or gender issue was considered in this study.                                             |
| Reporting on race, ethnicity, or other socially relevant groupings | Not applicable.                                                                                                                             |
| Population characteristics                                         | Due to the limited sample size (3 donors), no population issue was considered in this study.                                                |
| Recruitment                                                        | The donors are volunteers donating blood to the Etablissement Francais du Sang - Occitanie (Toulouse, France). There were fully anonymized. |
| Ethics oversight                                                   | Comité de Protection des Personnes (CPP) Sud-Ouest et Outre-Mer I/II.                                                                       |

Note that full information on the approval of the study protocol must also be provided in the manuscript.

## Field-specific reporting

Please select the one below that is the best fit for your research. If you are not sure, read the appropriate sections before making your selection.

Life sciences  Behavioural & social sciences  Ecological, evolutionary & environmental sciences

For a reference copy of the document with all sections, see [nature.com/documents/nr-reporting-summary-flat.pdf](https://www.nature.com/documents/nr-reporting-summary-flat.pdf)

## Life sciences study design

All studies must disclose on these points even when the disclosure is negative.

|                 |                                                                                                                                                                                                                                 |
|-----------------|---------------------------------------------------------------------------------------------------------------------------------------------------------------------------------------------------------------------------------|
| Sample size     | The main biological findings established with T cells from one donor were confirmed with T cells from two other donors. Such sample size is usually sufficient in ensuring that the basic cell biology observations are robust. |
| Data exclusions | No data were excluded.                                                                                                                                                                                                          |
| Replication     | The experiments reported in the study included technical replicates, as stated in the figure legends. They were systematically reproduced at least once through independent experiments.                                        |
| Randomization   | Given the sample size, randomization is not relevant.                                                                                                                                                                           |
| Blinding        | Not relevant since we did not expect a priori any sort of differences among the donors.                                                                                                                                         |

## Reporting for specific materials, systems and methods

We require information from authors about some types of materials, experimental systems and methods used in many studies. Here, indicate whether each material, system or method listed is relevant to your study. If you are not sure if a list item applies to your research, read the appropriate section before selecting a response.

### Materials & experimental systems

| n/a                                 | Involvement in the study                                  |
|-------------------------------------|-----------------------------------------------------------|
| <input type="checkbox"/>            | <input checked="" type="checkbox"/> Antibodies            |
| <input type="checkbox"/>            | <input checked="" type="checkbox"/> Eukaryotic cell lines |
| <input checked="" type="checkbox"/> | <input type="checkbox"/> Palaeontology and archaeology    |
| <input checked="" type="checkbox"/> | <input type="checkbox"/> Animals and other organisms      |
| <input checked="" type="checkbox"/> | <input type="checkbox"/> Clinical data                    |
| <input checked="" type="checkbox"/> | <input type="checkbox"/> Dual use research of concern     |
| <input checked="" type="checkbox"/> | <input type="checkbox"/> Plants                           |

### Methods

| n/a                                 | Involvement in the study                           |
|-------------------------------------|----------------------------------------------------|
| <input checked="" type="checkbox"/> | <input type="checkbox"/> ChIP-seq                  |
| <input type="checkbox"/>            | <input checked="" type="checkbox"/> Flow cytometry |
| <input checked="" type="checkbox"/> | <input type="checkbox"/> MRI-based neuroimaging    |

## Antibodies

|                 |                                                                                                                                                                                                                                                                     |
|-----------------|---------------------------------------------------------------------------------------------------------------------------------------------------------------------------------------------------------------------------------------------------------------------|
| Antibodies used | anti-CD3 (clone OKT3, Invitrogen ref : 16-0037-85), anti-CD11a Af594 (clone Hi-111, Biolegend ref : 301222), biotin anti-CD11a/CD18 (clone m24, Biolegend ref : 363424), anti-CD11a Af488 (clone Hi-111, Biolegend ref : 301216), anti-CD11a/CD18 Af647 (clone m24, |
|-----------------|---------------------------------------------------------------------------------------------------------------------------------------------------------------------------------------------------------------------------------------------------------------------|

Biolegend ref : 363412), anti-CD8 (clone RPAT8, BD Biosciences ref : 555367), anti-LAMP1/CD107a PE (clone H4A3, BD Biosciences ref : 560948), anti-CD8 PerCP Cy5.5 (clone MEM-31, Sysmex ref : AE134275), anti-CD11a FITC (clone TS2/4, Biolegend ref : 350604), anti-CD54 (clone YN1/1.7.4, Biolegend ref : 116102).

Validation

Antibody used have all been validated in previous reports.

## Eukaryotic cell lines

Policy information about [cell lines and Sex and Gender in Research](#)

Cell line source(s)

The GFP-expressing P815 cell line was previously generated in our laboratory (Houmadi et al., Cell Reports 2018).

Authentication

The cell line was regularly checked for ICAM-1 and GFP expression.

Mycoplasma contamination

Mycoplasma tests were routinely performed on the cell lines used in the study and were negative.

Commonly misidentified lines  
(See [ICLAC](#) register)

No commonly misidentified lines were used (according to ICLAC register).

## Plants

Seed stocks

*Report on the source of all seed stocks or other plant material used. If applicable, state the seed stock centre and catalogue number. If plant specimens were collected from the field, describe the collection location, date and sampling procedures.*

Novel plant genotypes

*Describe the methods by which all novel plant genotypes were produced. This includes those generated by transgenic approaches, gene editing, chemical/radiation-based mutagenesis and hybridization. For transgenic lines, describe the transformation method, the number of independent lines analyzed and the generation upon which experiments were performed. For gene-edited lines, describe the editor used, the endogenous sequence targeted for editing, the targeting guide RNA sequence (if applicable) and how the editor was applied.*

Authentication

*Describe any authentication procedures for each seed stock used or novel genotype generated. Describe any experiments used to assess the effect of a mutation and, where applicable, how potential secondary effects (e.g. second site T-DNA insertions, mosaicism, off-target gene editing) were examined.*

## Flow Cytometry

### Plots

Confirm that:

- The axis labels state the marker and fluorochrome used (e.g. CD4-FITC).
- The axis scales are clearly visible. Include numbers along axes only for bottom left plot of group (a 'group' is an analysis of identical markers).
- All plots are contour plots with outliers or pseudocolor plots.
- A numerical value for number of cells or percentage (with statistics) is provided.

### Methodology

Sample preparation

the T cells has been isolated from human blood sample with Ficoll Paques, and cultivated as detailed in the Materials and Methods section of the manuscript.

Instrument

BD LSRFortessa™ X-20 Cell Analyzer.

Software

Diva (acquisition) and Flowjo (analysis).

Cell population abundance

At least 10 000 cells per condition.

Gating strategy

Gating strategy is shown in the Supplementary Fig. 4 and 5A.

- Tick this box to confirm that a figure exemplifying the gating strategy is provided in the Supplementary Information.
